# Supplementary material for: Genomic diversity of the Japanese wheat core collection and selection of alleles for agronomic traits in the breeding process
Source: PubMed Central journal article supplement (PMC11561409; doi:10.1270/jsbbs.23064), 2024-06-25
Supplement: 74_259-s2.pdf [file 74_259-s2.pdf]

**Supplemental Table 1. Accessions in the NARO Japanese wheat core collection**

| Accession ID <sup>1)</sup> | Cultivar name             | Status             | Category <sup>2)</sup> | Locality  | Area <sup>3)</sup>    | Population <sup>4)</sup> | <i>Rht-D1</i> <sup>5)</sup> | <i>Rht-B1</i> <sup>5)</sup> |
|----------------------------|---------------------------|--------------------|------------------------|-----------|-----------------------|--------------------------|-----------------------------|-----------------------------|
| JWC 01                     | Akagawa aka               | Landrace           | Classical              | Hokkaido  | Hokkaido              | I                        | <i>Rht-D1a</i>              | <i>Rht-B1a</i>              |
| JWC 02                     | Shirohada                 | Unknown            | Classical              | Hokkaido  | Hokkaido              | I                        | <i>Rht-D1a</i>              | <i>Rht-B1a</i>              |
| JWC 03                     | Dawson 1                  | Pure selected line | Classical              | Hokkaido  | Hokkaido              | I                        | <i>Rht-D1a</i>              | <i>Rht-B1a</i>              |
| JWC 04                     | Sapporo Harukomugi        | Breeders line      | Classical              | Hokkaido  | Hokkaido              | I                        | <i>Rht-D1a</i>              | <i>Rht-B1a</i>              |
| JWC 05                     | Soshu 2                   | Pure selected line | Classical              | Aomori    | Tohoku                | III                      | <i>Rht-D1a</i>              | <i>Rht-B1a</i>              |
| JWC 06                     | Shisen 1                  | Pure selected line | Classical              | Iwate     | Tohoku                | III                      | <i>Rht-D1a</i>              | <i>Rht-B1a</i>              |
| JWC 07                     | Zairai Fultz              | Landrace           | Classical              | Iwate     | Tohoku                | III                      | <i>Rht-D1b</i>              | <i>Rht-B1a</i>              |
| JWC 08                     | Nishimura                 | Breeders line      | Classical              | Yamagata  | Tohoku                | III                      | <i>Rht-D1a</i>              | <i>Rht-B1a</i>              |
| JWC 09                     | Shirasaya                 | Unknown            | Classical              | Ibaraki   | Kanto/Tosan           | III                      | <i>Rht-D1a</i>              | <i>Rht-B1a</i>              |
| JWC 10                     | Fukoku                    | Breeders line      | Classical              | Ibaraki   | Kanto/Tosan           | III                      | <i>Rht-D1a</i>              | <i>Rht-B1a</i>              |
| JWC 11                     | Akagara Ibaraki 1         | Pure selected line | Classical              | Ibaraki   | Kanto/Tosan           | I                        | <i>Rht-D1a</i>              | <i>Rht-B1a</i>              |
| JWC 12                     | Shirosanjaku              | Unknown            | Classical              | Ibaraki   | Kanto/Tosan           | III                      | <i>Rht-D1a</i>              | <i>Rht-B1a</i>              |
| JWC 13                     | Akaboro 1                 | Pure selected line | Classical              | Tochigi   | Kanto/Tosan           | III                      | <i>Rht-D1a</i>              | <i>Rht-B1a</i>              |
| JWC 14                     | Nittawase                 | Landrace           | Classical              | Gunma     | Kanto/Tosan           | III                      | <i>Rht-D1a</i>              | <i>Rht-B1a</i>              |
| JWC 15                     | Sunekiri 15               | Pure selected line | Classical              | Gunma     | Kanto/Tosan           | III                      | <i>Rht-D1b</i>              | <i>Rht-B1a</i>              |
| JWC 16                     | Akabouzu                  | Breeders line      | Classical              | Saitama   | Kanto/Tosan           | III                      | <i>Rht-D1a</i>              | <i>Rht-B1a</i>              |
| JWC 17                     | Hosogara                  | Breeders line      | Classical              | Chiba     | Kanto/Tosan           | III                      | <i>Rht-D1a</i>              | <i>Rht-B1a</i>              |
| JWC 18                     | Shiroadaruma              | Breeders line      | Classical              | Kanagawa  | Kanto/Tosan           | III                      | <i>Rht-D1b</i>              | <i>Rht-B1a</i>              |
| JWC 19                     | Akadaruma                 | Breeders line      | Classical              | Kanagawa  | Kanto/Tosan           | III                      | <i>Rht-D1b</i>              | <i>Rht-B1a</i>              |
| JWC 20                     | Wase komugi               | Breeders line      | Classical              | Kanagawa  | Kanto/Tosan           | II                       | <i>Rht-D1a</i>              | <i>Rht-B1b</i>              |
| JWC 21                     | Aka komugi                | Landrace           | Classical              | Yamanashi | Kanto/Tosan           | III                      | <i>Rht-D1a</i>              | <i>Rht-B1a</i>              |
| JWC 22                     | Shibushirazu              | Breeders line      | Classical              | Nagano    | Kanto/Tosan           | III                      | <i>Rht-D1a</i>              | <i>Rht-B1a</i>              |
| JWC 23                     | Koshigun zairai shu       | Landrace           | Classical              | Niigata   | Kanto/Tosan           | III                      | <i>Rht-D1a</i>              | <i>Rht-B1a</i>              |
| JWC 24                     | Shirochabo                | Unknown            | Classical              | Mie       | Tokai/Hokuriku        | III                      | <i>Rht-D1b</i>              | <i>Rht-B1a</i>              |
| JWC 25                     | Sakobore                  | Breeders line      | Classical              | Shizuoka  | Tokai/Hokuriku        | III                      | <i>Rht-D1a</i>              | <i>Rht-B1a</i>              |
| JWC 26                     | Shin Chunaga              | Pure selected line | Classical              | Hyogo     | Kinki/Chugoku/Shikoku | III                      | <i>Rht-D1a</i>              | <i>Rht-B1a</i>              |
| JWC 27                     | Hatakeda komugi           | Breeders line      | Classical              | Okayama   | Kinki/Chugoku/Shikoku | III                      | <i>Rht-D1a</i>              | <i>Rht-B1a</i>              |
| JWC 28                     | Yushoki 347               | Unknown            | Classical              | Okayama   | Kinki/Chugoku/Shikoku | III                      | <i>Rht-D1b</i>              | <i>Rht-B1a</i>              |
| JWC 29                     | Hiroshima Shipree         | Unknown            | Classical              | Hiroshima | Kinki/Chugoku/Shikoku | III                      | <i>Rht-D1b</i>              | <i>Rht-B1a</i>              |
| JWC 30                     | Mubouchinko               | Breeders line      | Classical              | Hiroshima | Kinki/Chugoku/Shikoku | III                      | <i>Rht-D1b</i>              | <i>Rht-B1a</i>              |
| JWC 31                     | Hiraki komugi             | Landrace           | Classical              | Tottori   | Kinki/Chugoku/Shikoku | III                      | <i>Rht-D1a</i>              | <i>Rht-B1a</i>              |
| JWC 32                     | Nakasoshu                 | Unknown            | Classical              | Kagawa    | Kinki/Chugoku/Shikoku | III                      | <i>Rht-D1a</i>              | <i>Rht-B1a</i>              |
| JWC 33                     | Homan                     | Unknown            | Classical              | Tochigi   | Kanto/Tosan           | III                      | <i>Rht-D1a</i>              | <i>Rht-B1a</i>              |
| JWC 34                     | Sekichiku 1               | Pure selected line | Classical              | Aichi     | Tokai/Hokuriku        | III                      | <i>Rht-D1b</i>              | <i>Rht-B1a</i>              |
| JWC 35                     | Eshima shinriki           | Breeders line      | Classical              | Fukuoka   | Kyushu                | III                      | <i>Rht-D1a</i>              | <i>Rht-B1a</i>              |
| JWC 36                     | Igachikugo                | Unknown            | Classical              | Saga      | Kyushu                | III                      | <i>Rht-D1a</i>              | <i>Rht-B1a</i>              |
| JWC 37                     | Shiro komugi              | Landrace           | Classical              | Saga      | Kyushu                | III                      | <i>Rht-D1a</i>              | <i>Rht-B1a</i>              |
| JWC 38                     | Chikuzen                  | Landrace           | Classical              | Saga      | Kyushu                | III                      | <i>Rht-D1a</i>              | <i>Rht-B1a</i>              |
| JWC 39                     | Ichigo Haya komugi        | Pure selected line | Classical              | Kumamoto  | Kyushu                | III                      | <i>Rht-D1a</i>              | <i>Rht-B1a</i>              |
| JWC 40                     | Shirobunbu                | Breeders line      | Classical              | Kumamoto  | Kyushu                | III                      | <i>Rht-D1a</i>              | <i>Rht-B1a</i>              |
| JWC 41                     | Aso zairai (yuubou kappu) | Landrace           | Classical              | Kumamoto  | Kyushu                | III                      | <i>Rht-D1a</i>              | <i>Rht-B1a</i>              |
| JWC 42                     | Sotome                    | Breeders line      | Classical              | Nagasaki  | Kyushu                | III                      | <i>Rht-D1a</i>              | <i>Rht-B1a</i>              |
| JWC 43                     | Sadabozu                  | Landrace           | Classical              | Miyazaki  | Kyushu                | III                      | <i>Rht-D1a</i>              | <i>Rht-B1a</i>              |
| JWC 44                     | Nobeokabouzu komugi       | Landrace           | Classical              | Miyazaki  | Kyushu                | III                      | <i>Rht-D1a</i>              | <i>Rht-B1a</i>              |
| JWC 45                     | Sakigake 1                | Pure selected line | Classical              | Kagoshima | Kyushu                | III                      | <i>Rht-D1a</i>              | <i>Rht-B1a</i>              |
| JWC 46                     | Akasabishirazu 1          | Breeders line      | Modern                 | Hokkaido  | Hokkaido              | I                        | <i>Rht-D1a</i>              | <i>Rht-B1a</i>              |
| JWC 47                     | Honkei 275                | Breeders line      | Modern                 | Hokkaido  | Hokkaido              | III                      | <i>Rht-D1a</i>              | <i>Rht-B1a</i>              |
| JWC 48                     | Hokkai 240                | Breeders line      | Modern                 | Hokkaido  | Hokkaido              | I                        | <i>Rht-D1b</i>              | <i>Rht-B1a</i>              |
| JWC 49                     | Konosu 25                 | Breeders line      | Modern                 | Saitama   | Kanto/Tosan           | III                      | <i>Rht-D1a</i>              | <i>Rht-B1a</i>              |
| JWC 50                     | Saitama 27                | Breeders line      | Modern                 | Saitama   | Kanto/Tosan           | II                       | <i>Rht-D1a</i>              | <i>Rht-B1b</i>              |
| JWC 51                     | Kanto 107                 | Breeders line      | Modern                 | Ibaraki   | Kanto/Tosan           | II                       | <i>Rht-D1a</i>              | <i>Rht-B1b</i>              |
| JWC 52                     | Igachikugo Oregon         | Breeders line      | Modern                 | Nagano    | Kanto/Tosan           | I                        | <i>Rht-D1a</i>              | <i>Rht-B1a</i>              |
| JWC 53                     | Gokuwase 4-15             | Breeders line      | Modern                 | Hiroshima | Kinki/Chugoku/Shikoku | II                       | <i>Rht-D1a</i>              | <i>Rht-B1a</i>              |
| JWC 54                     | Komugi Norin 1            | Breeders line      | Modern                 | Iwate     | Tohoku                | I                        | <i>Rht-D1b</i>              | <i>Rht-B1a</i>              |
| JWC 55                     | Harumakikomugi Norin 3    | Breeders line      | Modern                 | Hokkaido  | Hokkaido              | I                        | <i>Rht-D1a</i>              | <i>Rht-B1a</i>              |
| JWC 56                     | Komugi Norin 9            | Breeders line      | Modern                 | Aichi     | Tokai/Hokuriku        | III                      | <i>Rht-D1b</i>              | <i>Rht-B1a</i>              |
| JWC 57                     | Komugi Norin 10           | Breeders line      | Modern                 | Iwate     | Tohoku                | I                        | <i>Rht-D1b</i>              | <i>Rht-B1b</i>              |

|        |                         |               |        |           |                       |     |                |                |
|--------|-------------------------|---------------|--------|-----------|-----------------------|-----|----------------|----------------|
| JWC 58 | Komugi Norin 16         | Breeders line | Modern | Gunma     | Kanto/Tosan           | III | <i>Rht-D1b</i> | <i>Rht-B1a</i> |
| JWC 59 | Komugi Norin 26         | Breeders line | Modern | Nara      | Kinki/Chugoku/Shikoku | II  | <i>Rht-D1a</i> | <i>Rht-B1b</i> |
| JWC 60 | Komugi Norin 27         | Breeders line | Modern | Iwate     | Tohoku                | I   | <i>Rht-D1a</i> | <i>Rht-B1a</i> |
| JWC 61 | Komugi Norin 39         | Breeders line | Modern | Iwate     | Tohoku                | I   | <i>Rht-D1a</i> | <i>Rht-B1a</i> |
| JWC 62 | Koshitsukomugi Norin 42 | Breeders line | Modern | Gunma     | Kanto/Tosan           | I   | <i>Rht-D1a</i> | <i>Rht-B1a</i> |
| JWC 63 | Komugi Norin 50         | Breeders line | Modern | Gunma     | Kanto/Tosan           | III | <i>Rht-D1b</i> | <i>Rht-B1a</i> |
| JWC 64 | Komugi Norin 53         | Breeders line | Modern | Aichi     | Tokai/Hokuriku        | III | <i>Rht-D1a</i> | <i>Rht-B1b</i> |
| JWC 65 | Komugi Norin 55         | Breeders line | Modern | Iwate     | Tohoku                | I   | <i>Rht-D1b</i> | <i>Rht-B1a</i> |
| JWC 66 | Komugi Norin 61         | Breeders line | Modern | Saga      | Kyushu                | III | <i>Rht-D1b</i> | <i>Rht-B1a</i> |
| JWC 67 | Komugi Norin 67         | Breeders line | Modern | Gunma     | Kanto/Tosan           | I   | <i>Rht-D1b</i> | <i>Rht-B1a</i> |
| JWC 68 | Harumakikomugi Norin 75 | Breeders line | Modern | Hokkaido  | Hokkaido              | I   | <i>Rht-D1a</i> | <i>Rht-B1a</i> |
| JWC 69 | Hokuei                  | Breeders line | Modern | Hokkaido  | Hokkaido              | I   | <i>Rht-D1a</i> | <i>Rht-B1a</i> |
| JWC 70 | Muka komugi             | Breeders line | Modern | Hokkaido  | Hokkaido              | I   | <i>Rht-D1b</i> | <i>Rht-B1a</i> |
| JWC 71 | Horoshiri komugi        | Breeders line | Modern | Hokkaido  | Hokkaido              | I   | <i>Rht-D1b</i> | <i>Rht-B1a</i> |
| JWC 72 | Takune komugi           | Breeders line | Modern | Hokkaido  | Hokkaido              | I   | <i>Rht-D1b</i> | <i>Rht-B1a</i> |
| JWC 73 | Haruhikari              | Breeders line | Modern | Hokkaido  | Hokkaido              | I   | <i>Rht-D1a</i> | <i>Rht-B1a</i> |
| JWC 74 | Aoba komugi             | Breeders line | Modern | Iwate     | Tohoku                | III | <i>Rht-D1b</i> | <i>Rht-B1a</i> |
| JWC 75 | Hitsumi komugi          | Breeders line | Modern | Iwate     | Tohoku                | I   | <i>Rht-D1b</i> | <i>Rht-B1a</i> |
| JWC 76 | Furutsu masari          | Breeders line | Modern | Iwate     | Tohoku                | I   | <i>Rht-D1b</i> | <i>Rht-B1a</i> |
| JWC 77 | Yukichabo               | Breeders line | Modern | Niigata   | Kanto/Tosan           | I   | <i>Rht-D1b</i> | <i>Rht-B1a</i> |
| JWC 78 | Hikari komugi           | Breeders line | Modern | Niigata   | Kanto/Tosan           | I   | <i>Rht-D1a</i> | <i>Rht-B1a</i> |
| JWC 79 | Fukuho komugi           | Breeders line | Modern | Saitama   | Kanto/Tosan           | III | <i>Rht-D1a</i> | <i>Rht-B1b</i> |
| JWC 80 | Fukuwase komugi         | Breeders line | Modern | Hiroshima | Kinki/Chugoku/Shikoku | III | <i>Rht-D1a</i> | <i>Rht-B1a</i> |
| JWC 81 | Abukumawase             | Breeders line | Modern | Fukuoka   | Kyushu                | II  | <i>Rht-D1a</i> | <i>Rht-B1b</i> |
| JWC 82 | Hokushin                | Breeders line | Modern | Hokkaido  | Hokkaido              | I   | <i>Rht-D1b</i> | <i>Rht-B1a</i> |
| JWC 83 | Chihoku komugi          | Breeders line | Modern | Hokkaido  | Hokkaido              | I   | <i>Rht-D1b</i> | <i>Rht-B1a</i> |
| JWC 84 | Haruyutaka              | Breeders line | Modern | Hokkaido  | Hokkaido              | I   | <i>Rht-D1a</i> | <i>Rht-B1b</i> |
| JWC 85 | Nanbu komugi            | Breeders line | Modern | Iwate     | Tohoku                | I   | <i>Rht-D1b</i> | <i>Rht-B1a</i> |
| JWC 86 | Kitakami komugi         | Breeders line | Modern | Iwate     | Tohoku                | I   | <i>Rht-D1b</i> | <i>Rht-B1a</i> |
| JWC 87 | Shirane komugi          | Breeders line | Modern | Nagano    | Kanto/Tosan           | III | <i>Rht-D1b</i> | <i>Rht-B1a</i> |
| JWC 88 | Bando wase              | Breeders line | Modern | Ibaraki   | Kanto/Tosan           | II  | <i>Rht-D1a</i> | <i>Rht-B1b</i> |
| JWC 89 | Shirogane komugi        | Breeders line | Modern | Fukuoka   | Kyushu                | II  | <i>Rht-D1a</i> | <i>Rht-B1b</i> |
| JWC 90 | Chikugoizumi            | Breeders line | Modern | Fukuoka   | Kyushu                | II  | <i>Rht-D1a</i> | <i>Rht-B1b</i> |
| JWC 91 | Komugi Norin 20         | Breeders line | Modern | Saga      | Kyushu                | III | <i>Rht-D1a</i> | <i>Rht-B1a</i> |
| JWC 92 | Fujimi komugi           | Breeders line | Modern | Saitama   | Kanto/Tosan           | II  | <i>Rht-D1a</i> | <i>Rht-B1b</i> |
| JWC 93 | Shirasagi komugi        | Breeders line | Modern | Hiroshima | Kinki/Chugoku/Shikoku | II  | <i>Rht-D1a</i> | <i>Rht-B1b</i> |
| JWC 94 | Junrei komugi           | Breeders line | Modern | Kagawa    | Kinki/Chugoku/Shikoku | II  | <i>Rht-D1a</i> | <i>Rht-B1b</i> |
| JWC 95 | Hachiman komugi         | Breeders line | Modern | Iwate     | Tohoku                | I   | <i>Rht-D1b</i> | <i>Rht-B1a</i> |
| JWC 96 | Chinese Spring          | Standard line |        | Sichuan   | China                 | III | <i>Rht-D1a</i> | <i>Rht-B1a</i> |

1) from the NIAS Genebank ([http://www.gene.affrc.go.jp/databases-core\\_collections\\_jw\\_en.php](http://www.gene.affrc.go.jp/databases-core_collections_jw_en.php))

2) Classical: landraces, pure selected lines, and breeders line before and lines bred before 1920's; Modern: lines bred after 1930's

3) detailed map location for the areas in Kobayashi et al. (2016, *Breed Sci*, 66:213-225)

4) from this study

5) genotypes for *Rht* genes from Kojima et al. (2017, *Bull. NARO Crop Sci.*, 1:1-13) and this study

**Supplemental Table 2. Primer sequences for detecting the alleles of *Rht-B1* and *Rht-D1* \***

| Alleles                    | Primer sequences                        |                                         |
|----------------------------|-----------------------------------------|-----------------------------------------|
|                            | Foreward                                | Reverse                                 |
| <i>Rht-B1a</i> (wild type) | 5'- GGT AGG GAG GCG AGA GGC GAG -3'     | 5'- CAT CCC CAT GGC CAT CTC GAG CTG -3' |
| <i>Rht-B1b</i> (dwarf)     | 5'- GGT AGG GAG GCG AGA GGC GAG -3'     | 5'- CAT CCC CAT GGC CAT CTC GAG CTA -3' |
| <i>Rht-D1a</i> (wild type) | 5'- GGC AAG CAA AAG CTT CGC G -3'       | 5'- GGC CAT CTC GAG CTG CAC -3'         |
| <i>Rht-D1b</i> (dwarf)     | 5'- CGC GCA ATT ATT GGC CAG AGA TAG -3' | 5'- CCC CAT GGC CAT CTC GAG CTG CTA -3' |

\*from Ellis et al. (2002)

**Supplemental Table 3. Summary of mapping statistics in three methods**

| Accession ID* | amplicon-seq     |                              |            |                   | RAD-seq          |                              |            |                   | GBS              |                              |            |                   | total            |                              |
|---------------|------------------|------------------------------|------------|-------------------|------------------|------------------------------|------------|-------------------|------------------|------------------------------|------------|-------------------|------------------|------------------------------|
|               | homozygous sites | alternative homozygous sites | mean depth | % of mapped reads | homozygous sites | alternative homozygous sites | mean depth | % of mapped reads | homozygous sites | alternative homozygous sites | mean depth | % of mapped reads | homozygous sites | alternative homozygous sites |
| JWC01         | 476              | 412                          | 83.60      | 88.52             | 5288             | 5399                         | 7.06       | 69.01             | 10004            | 8638                         | 5.83       | 71.97             | 15768            | 14449                        |
| JWC02         | 453              | 435                          | 79.15      | 87.10             | 5376             | 5311                         | 10.63      | 65.27             | 10330            | 8312                         | 5.32       | 72.01             | 16159            | 14058                        |
| JWC03         | 481              | 407                          | 91.88      | 89.43             | 5146             | 5541                         | 8.26       | 68.90             | 10080            | 8562                         | 5.29       | 70.34             | 15707            | 14510                        |
| JWC04         | 485              | 403                          | 92.88      | 90.20             | 5662             | 5025                         | 4.13       | 65.26             | 10502            | 8140                         | 4.94       | 70.23             | 16649            | 13568                        |
| JWC05         | 693              | 195                          | 79.60      | 90.14             | 9259             | 1428                         | 12.85      | 59.62             | 15344            | 3298                         | 4.79       | 73.28             | 25296            | 4921                         |
| JWC06         | 666              | 222                          | 89.28      | 89.98             | 8826             | 1861                         | 8.62       | 62.33             | 15021            | 3621                         | 4.89       | 73.54             | 24513            | 5704                         |
| JWC07         | 641              | 247                          | 92.58      | 90.14             | 8723             | 1964                         | 10.97      | 60.24             | 14541            | 4101                         | 4.81       | 72.20             | 23905            | 6312                         |
| JWC08         | 665              | 223                          | 82.43      | 88.99             | 8602             | 2085                         | 11.03      | 60.86             | 14665            | 3977                         | 4.93       | 73.10             | 23932            | 6285                         |
| JWC09         | 686              | 202                          | 99.54      | 90.84             | 8572             | 2115                         | 10.77      | 61.21             | 14708            | 3934                         | 5.05       | 73.29             | 23966            | 6251                         |
| JWC10         | 687              | 201                          | 101.20     | 90.75             | 9347             | 1340                         | 14.71      | 60.66             | 15284            | 3358                         | 4.74       | 72.31             | 25318            | 4899                         |
| JWC11         | 591              | 297                          | 85.76      | 89.52             | 7338             | 3349                         | 14.43      | 60.44             | 12952            | 5690                         | 4.53       | 70.69             | 20881            | 9336                         |
| JWC12         | 654              | 234                          | 88.40      | 89.96             | 8255             | 2432                         | 3.39       | 63.75             | 14325            | 4317                         | 4.90       | 71.93             | 23234            | 6983                         |
| JWC13         | 681              | 207                          | 99.31      | 90.66             | 8915             | 1772                         | 11.99      | 60.65             | 15120            | 3522                         | 4.67       | 73.26             | 24716            | 5501                         |
| JWC14         | 659              | 229                          | 85.55      | 90.32             | 8387             | 2300                         | 11.67      | 61.20             | 14395            | 4247                         | 4.71       | 71.66             | 23441            | 6776                         |
| JWC15         | 665              | 223                          | 97.62      | 90.93             | 8519             | 2168                         | 12.11      | 61.17             | 14525            | 4117                         | 3.07       | 71.77             | 23709            | 6508                         |
| JWC16         | 707              | 181                          | 95.57      | 91.46             | 8527             | 2160                         | 4.25       | 64.48             | 14595            | 4047                         | 4.60       | 73.30             | 23829            | 6388                         |
| JWC17         | 635              | 253                          | 96.19      | 90.41             | 7925             | 2762                         | 10.82      | 62.77             | 13723            | 4919                         | 4.47       | 72.57             | 22283            | 7934                         |
| JWC18         | 664              | 224                          | 98.69      | 90.58             | 8514             | 2173                         | 8.53       | 65.11             | 14507            | 4135                         | 4.51       | 72.43             | 23685            | 6532                         |
| JWC19         | 676              | 212                          | 88.73      | 90.60             | 8413             | 2274                         | 8.91       | 66.39             | 14528            | 4114                         | 4.57       | 71.67             | 23617            | 6600                         |
| JWC20         | 542              | 346                          | 96.01      | 90.16             | 7818             | 2869                         | 12.77      | 61.40             | 13705            | 4937                         | 4.51       | 71.71             | 22065            | 8152                         |
| JWC21         | 676              | 212                          | 93.27      | 90.50             | 8979             | 1708                         | 12.31      | 60.37             | 14979            | 3663                         | 4.68       | 72.75             | 24634            | 5583                         |
| JWC22         | 634              | 254                          | 85.66      | 89.88             | 8253             | 2434                         | 13.49      | 59.83             | 13960            | 4682                         | 4.88       | 71.17             | 22847            | 7370                         |
| JWC23         | 678              | 210                          | 89.00      | 90.10             | 8622             | 2065                         | 11.47      | 61.85             | 14780            | 3862                         | 4.51       | 71.95             | 24080            | 6137                         |
| JWC24         | 680              | 208                          | 66.51      | 86.11             | 8940             | 1747                         | 12.62      | 58.81             | 14954            | 3688                         | 3.02       | 71.68             | 24574            | 5643                         |
| JWC25         | 688              | 200                          | 62.02      | 84.79             | 8589             | 2098                         | 10.79      | 61.19             | 14668            | 3974                         | 3.11       | 71.56             | 23945            | 6272                         |
| JWC26         | 632              | 256                          | 51.85      | 81.80             | 8468             | 2219                         | 14.57      | 58.96             | 14519            | 4123                         | 2.47       | 71.45             | 23619            | 6598                         |
| JWC27         | 675              | 213                          | 93.35      | 89.13             | 8994             | 1693                         | 12.38      | 61.70             | 14979            | 3663                         | 5.34       | 72.59             | 24648            | 5569                         |
| JWC28         | 664              | 224                          | 96.09      | 90.50             | 8513             | 2174                         | 16.47      | 59.85             | 14509            | 4133                         | 4.90       | 72.36             | 23686            | 6531                         |
| JWC29         | 690              | 198                          | 92.78      | 89.81             | 8620             | 2067                         | 13.35      | 60.37             | 14643            | 3999                         | 4.38       | 69.22             | 23953            | 6264                         |
| JWC30         | 694              | 194                          | 88.40      | 90.27             | 8842             | 1845                         | 3.56       | 63.06             | 14925            | 3717                         | 5.00       | 72.82             | 24461            | 5756                         |
| JWC31         | 677              | 211                          | 79.25      | 90.17             | 8642             | 2045                         | 4.65       | 63.43             | 15016            | 3626                         | 4.83       | 73.62             | 24335            | 5882                         |
| JWC32         | 676              | 212                          | 106.82     | 90.27             | 8786             | 1901                         | 12.58      | 60.28             | 14854            | 3788                         | 5.00       | 71.90             | 24316            | 5901                         |

|       |     |     |        |       |      |      |       |       |       |      |       |       |       |       |
|-------|-----|-----|--------|-------|------|------|-------|-------|-------|------|-------|-------|-------|-------|
| JWC33 | 673 | 215 | 76.02  | 86.75 | 9356 | 1331 | 6.97  | 67.01 | 15147 | 3495 | 10.98 | 66.36 | 25176 | 5041  |
| JWC34 | 702 | 186 | 89.59  | 87.87 | 8919 | 1768 | 11.59 | 60.95 | 14887 | 3755 | 13.97 | 66.66 | 24508 | 5709  |
| JWC35 | 652 | 236 | 90.52  | 87.61 | 8639 | 2048 | 2.84  | 60.64 | 14112 | 4530 | 15.60 | 65.62 | 23403 | 6814  |
| JWC36 | 675 | 213 | 90.29  | 87.81 | 9005 | 1682 | 11.00 | 61.91 | 14971 | 3671 | 15.37 | 66.50 | 24651 | 5566  |
| JWC37 | 679 | 209 | 92.23  | 89.73 | 9092 | 1595 | 12.53 | 60.58 | 15039 | 3603 | 4.87  | 71.87 | 24810 | 5407  |
| JWC38 | 672 | 216 | 78.59  | 91.25 | 9365 | 1322 | 11.17 | 61.74 | 15146 | 3496 | 4.74  | 72.37 | 25183 | 5034  |
| JWC39 | 626 | 262 | 93.71  | 90.20 | 8144 | 2543 | 10.56 | 61.43 | 13818 | 4824 | 4.30  | 69.92 | 22588 | 7629  |
| JWC40 | 698 | 190 | 95.39  | 90.15 | 9366 | 1321 | 12.08 | 60.08 | 15414 | 3228 | 4.40  | 72.95 | 25478 | 4739  |
| JWC41 | 665 | 223 | 106.93 | 91.10 | 8139 | 2548 | 9.22  | 65.74 | 14265 | 4377 | 4.35  | 72.72 | 23069 | 7148  |
| JWC42 | 657 | 231 | 104.12 | 90.73 | 8989 | 1698 | 13.12 | 59.47 | 14773 | 3869 | 4.47  | 72.29 | 24419 | 5798  |
| JWC43 | 678 | 210 | 90.98  | 88.20 | 9219 | 1468 | 14.82 | 60.89 | 15374 | 3268 | 4.69  | 72.40 | 25271 | 4946  |
| JWC44 | 701 | 187 | 95.67  | 89.51 | 8816 | 1871 | 11.12 | 61.31 | 14860 | 3782 | 4.81  | 72.66 | 24377 | 5840  |
| JWC45 | 691 | 197 | 89.69  | 89.09 | 8569 | 2118 | 5.85  | 58.05 | 14642 | 4000 | 4.57  | 72.65 | 23902 | 6315  |
| JWC46 | 426 | 462 | 92.57  | 89.33 | 5004 | 5683 | 12.13 | 61.98 | 9624  | 9018 | 4.52  | 69.55 | 15054 | 15163 |
| JWC47 | 568 | 320 | 99.25  | 90.08 | 7748 | 2939 | 10.34 | 62.27 | 13136 | 5506 | 4.65  | 66.42 | 21452 | 8765  |
| JWC48 | 528 | 360 | 108.51 | 90.78 | 6242 | 4445 | 12.56 | 61.49 | 11808 | 6834 | 4.86  | 70.85 | 18578 | 11639 |
| JWC49 | 549 | 339 | 105.96 | 90.52 | 7606 | 3081 | 8.18  | 65.18 | 13153 | 5489 | 4.23  | 69.91 | 21308 | 8909  |
| JWC50 | 546 | 342 | 96.96  | 90.06 | 7536 | 3151 | 7.42  | 63.49 | 13377 | 5265 | 3.94  | 70.32 | 21459 | 8758  |
| JWC51 | 518 | 370 | 98.70  | 90.02 | 7679 | 3008 | 13.81 | 60.58 | 13155 | 5487 | 3.91  | 69.78 | 21352 | 8865  |
| JWC52 | 515 | 373 | 96.84  | 89.96 | 6913 | 3774 | 14.23 | 61.93 | 12201 | 6441 | 4.01  | 70.75 | 19629 | 10588 |
| JWC53 | 507 | 381 | 97.59  | 89.22 | 7530 | 3157 | 14.59 | 59.73 | 12972 | 5670 | 3.85  | 69.68 | 21009 | 9208  |
| JWC54 | 565 | 323 | 81.42  | 88.73 | 7022 | 3665 | 13.24 | 60.70 | 12700 | 5942 | 4.22  | 72.01 | 20287 | 9930  |
| JWC55 | 514 | 374 | 101.75 | 89.90 | 5597 | 5090 | 3.04  | 67.31 | 10802 | 7840 | 4.69  | 68.34 | 16913 | 13304 |
| JWC56 | 642 | 246 | 87.95  | 89.07 | 8666 | 2021 | 9.32  | 61.37 | 14275 | 4367 | 4.98  | 70.98 | 23583 | 6634  |
| JWC57 | 564 | 324 | 108.00 | 90.54 | 7215 | 3472 | 4.50  | 62.20 | 12734 | 5908 | 4.41  | 71.94 | 20513 | 9704  |
| JWC58 | 560 | 328 | 107.83 | 90.16 | 7444 | 3243 | 14.47 | 60.00 | 12655 | 5987 | 4.03  | 71.16 | 20659 | 9558  |
| JWC59 | 542 | 346 | 91.18  | 89.15 | 7810 | 2877 | 13.05 | 61.10 | 13713 | 4929 | 4.20  | 71.24 | 22065 | 8152  |
| JWC60 | 468 | 420 | 100.74 | 90.12 | 6579 | 4108 | 15.27 | 62.51 | 11410 | 7232 | 4.63  | 70.25 | 18457 | 11760 |
| JWC61 | 529 | 359 | 81.24  | 88.95 | 6138 | 4549 | 15.04 | 61.57 | 11602 | 7040 | 4.61  | 71.85 | 18269 | 11948 |
| JWC62 | 541 | 347 | 88.87  | 88.78 | 6802 | 3885 | 10.51 | 61.42 | 12100 | 6542 | 3.91  | 68.49 | 19443 | 10774 |
| JWC63 | 620 | 268 | 95.85  | 89.80 | 8588 | 2099 | 3.67  | 64.15 | 14386 | 4256 | 2.90  | 70.79 | 23594 | 6623  |
| JWC64 | 598 | 290 | 93.70  | 90.19 | 8232 | 2455 | 11.34 | 61.22 | 14093 | 4549 | 3.22  | 40.12 | 22923 | 7294  |
| JWC65 | 536 | 352 | 105.68 | 89.31 | 7147 | 3540 | 11.61 | 63.54 | 12099 | 6543 | 3.59  | 55.20 | 19782 | 10435 |
| JWC66 | 627 | 261 | 86.36  | 90.06 | 8222 | 2465 | 12.14 | 60.13 | 14185 | 4457 | 3.24  | 43.69 | 23034 | 7183  |
| JWC67 | 534 | 354 | 83.69  | 88.09 | 6380 | 4307 | 14.00 | 61.62 | 11718 | 6924 | 3.89  | 68.69 | 18632 | 11585 |
| JWC68 | 497 | 391 | 84.64  | 89.01 | 5541 | 5146 | 4.08  | 67.88 | 10882 | 7760 | 4.35  | 70.34 | 16920 | 13297 |
| JWC69 | 457 | 431 | 83.95  | 88.19 | 5480 | 5207 | 15.95 | 61.51 | 10078 | 8564 | 4.01  | 69.55 | 16015 | 14202 |

|       |     |     |       |       |       |      |       |       |       |      |      |       |       |       |
|-------|-----|-----|-------|-------|-------|------|-------|-------|-------|------|------|-------|-------|-------|
| JWC70 | 465 | 423 | 84.18 | 88.57 | 5795  | 4892 | 11.72 | 63.07 | 10722 | 7920 | 4.05 | 69.24 | 16982 | 13235 |
| JWC71 | 493 | 395 | 71.49 | 86.99 | 6039  | 4648 | 11.78 | 62.43 | 11315 | 7327 | 4.13 | 70.48 | 17847 | 12370 |
| JWC72 | 458 | 430 | 91.52 | 88.94 | 5738  | 4949 | 11.57 | 62.91 | 10956 | 7686 | 3.68 | 69.19 | 17152 | 13065 |
| JWC73 | 515 | 373 | 96.30 | 89.47 | 5907  | 4780 | 14.15 | 61.93 | 11118 | 7524 | 4.39 | 69.64 | 17540 | 12677 |
| JWC74 | 564 | 324 | 80.40 | 87.66 | 7901  | 2786 | 5.61  | 63.33 | 13252 | 5390 | 3.51 | 69.91 | 21717 | 8500  |
| JWC75 | 525 | 363 | 88.32 | 89.87 | 6589  | 4098 | 12.16 | 65.31 | 11669 | 6973 | 4.49 | 70.92 | 18783 | 11434 |
| JWC76 | 529 | 359 | 80.94 | 90.04 | 6910  | 3777 | 9.87  | 64.12 | 12522 | 6120 | 4.60 | 71.45 | 19961 | 10256 |
| JWC77 | 527 | 361 | 76.44 | 87.48 | 5961  | 4726 | 13.12 | 62.63 | 11199 | 7443 | 4.14 | 70.81 | 17687 | 12530 |
| JWC78 | 482 | 406 | 80.64 | 87.81 | 6175  | 4512 | 14.77 | 62.76 | 11057 | 7585 | 4.31 | 68.55 | 17714 | 12503 |
| JWC79 | 578 | 310 | 86.14 | 89.94 | 7664  | 3023 | 11.70 | 62.33 | 13709 | 4933 | 4.35 | 70.20 | 21951 | 8266  |
| JWC80 | 598 | 290 | 85.30 | 89.06 | 7678  | 3009 | 9.91  | 62.33 | 13265 | 5377 | 3.76 | 68.87 | 21541 | 8676  |
| JWC81 | 588 | 300 | 90.94 | 88.85 | 8140  | 2547 | 14.37 | 60.10 | 13972 | 4670 | 4.02 | 71.00 | 22700 | 7517  |
| JWC82 | 448 | 440 | 89.83 | 88.94 | 5436  | 5251 | 12.00 | 61.94 | 10767 | 7875 | 4.12 | 69.16 | 16651 | 13566 |
| JWC83 | 471 | 417 | 91.26 | 89.51 | 5602  | 5085 | 12.99 | 63.10 | 10989 | 7653 | 4.45 | 71.17 | 17062 | 13155 |
| JWC84 | 527 | 361 | 87.92 | 90.09 | 6594  | 4093 | 11.95 | 64.07 | 12052 | 6590 | 4.48 | 71.18 | 19173 | 11044 |
| JWC85 | 440 | 448 | 85.29 | 88.08 | 5958  | 4729 | 15.85 | 63.82 | 10936 | 7706 | 4.30 | 70.11 | 17334 | 12883 |
| JWC86 | 499 | 389 | 80.00 | 89.46 | 6463  | 4224 | 4.66  | 65.14 | 11782 | 6860 | 4.65 | 70.45 | 18744 | 11473 |
| JWC87 | 582 | 306 | 82.66 | 89.53 | 7473  | 3214 | 11.87 | 62.10 | 12941 | 5701 | 4.20 | 70.56 | 20996 | 9221  |
| JWC88 | 553 | 335 | 76.06 | 89.72 | 7704  | 2983 | 9.53  | 62.31 | 13645 | 4997 | 3.92 | 70.39 | 21902 | 8315  |
| JWC89 | 589 | 299 | 96.17 | 89.67 | 8276  | 2411 | 11.88 | 61.29 | 13969 | 4673 | 4.25 | 71.88 | 22834 | 7383  |
| JWC90 | 536 | 352 | 98.01 | 89.98 | 7760  | 2927 | 11.63 | 62.47 | 13477 | 5165 | 3.98 | 70.11 | 21773 | 8444  |
| JWC91 | 625 | 263 | 91.86 | 89.85 | 8131  | 2556 | 7.82  | 66.10 | 13814 | 4828 | 4.82 | 66.36 | 22570 | 7647  |
| JWC92 | 524 | 364 | 88.58 | 88.97 | 7642  | 3045 | 12.04 | 61.12 | 13174 | 5468 | 4.56 | 68.37 | 21340 | 8877  |
| JWC93 | 542 | 346 | 90.02 | 89.15 | 7814  | 2873 | 11.88 | 61.36 | 13707 | 4935 | 3.78 | 70.91 | 22063 | 8154  |
| JWC94 | 560 | 328 | 82.46 | 87.88 | 8423  | 2264 | 9.65  | 61.92 | 14180 | 4462 | 4.16 | 70.69 | 23163 | 7054  |
| JWC95 | 529 | 359 | 79.53 | 88.04 | 7708  | 2979 | 11.14 | 63.02 | 18427 | 215  | 4.13 | 73.04 | 26664 | 3553  |
| JWC96 | 882 | 6   | 79.13 | 89.17 | 10196 | 491  | 5.32  | 64.01 | 12039 | 6603 | 4.77 | 71.24 | 23117 | 7100  |

\*: from the NIAS Genebank ([http://www.gene.affrc.go.jp/databases-core\\_collections\\_jw\\_en.php](http://www.gene.affrc.go.jp/databases-core_collections_jw_en.php))

**Supplemental Table 4. SNP marker distribution in the A, B, D and whole genomes**

| Chr.           | No. of SNP markers |       |      |       | SNP marker density (Mb/marker)* |       |       |       |
|----------------|--------------------|-------|------|-------|---------------------------------|-------|-------|-------|
|                | A                  | B     | D    | Total | A                               | B     | D     | Total |
| <b>1</b>       | 1906               | 2070  | 350  | 4326  | 0.314                           | 0.338 | 1.425 | 0.416 |
| <b>2</b>       | 1978               | 2728  | 651  | 5357  | 0.398                           | 0.298 | 1.009 | 0.421 |
| <b>3</b>       | 1282               | 3362  | 295  | 4939  | 0.588                           | 0.253 | 2.100 | 0.451 |
| <b>4</b>       | 1787               | 748   | 131  | 2666  | 0.422                           | 0.901 | 3.957 | 0.730 |
| <b>5</b>       | 1460               | 2086  | 213  | 3759  | 0.489                           | 0.343 | 2.676 | 0.532 |
| <b>6</b>       | 1479               | 2756  | 278  | 4513  | 0.421                           | 0.265 | 1.782 | 0.410 |
| <b>7</b>       | 2028               | 2206  | 364  | 4598  | 0.367                           | 0.346 | 1.766 | 0.468 |
| <b>unknown</b> |                    |       |      | 59    |                                 |       |       | 5.959 |
| <b>All</b>     | 11920              | 15956 | 2282 | 30217 | 0.417                           | 0.329 | 1.753 | 0.482 |

Chr., chromosome

\*The length of each chromosome was referred to Zhu et al. (2021)

**Supplemental Table 5. Pairwise mean Fst values  
(Weir and Cockerham) between three populations  
calculated SNPs between populations**

| Population | Population | Weir and Cockerham mean Fst |
|------------|------------|-----------------------------|
| I          | II         | 0.220                       |
| I          | III        | 0.268                       |
| II         | III        | 0.151                       |

**Supplemental Table 6. Marker–trait associations (MTAs) over multiple years for the days to heading (DH)**

| Chr.        | Position         | Marker           | Year  | log10(-p) | Marker R <sup>2</sup> |
|-------------|------------------|------------------|-------|-----------|-----------------------|
| 4D          | 497,933,062      | G_Ch4D_497933062 | 2018  | 4.216     | 0.179                 |
|             |                  |                  | 2017  | 3.416     | 0.129                 |
|             |                  |                  | 2020  | 3.122     | 0.112                 |
| 6B          | 35,332,901       | G_Ch6B_35332901  | 2019  | 3.814     | 0.148                 |
|             |                  |                  | 2018  | 3.667     | 0.150                 |
|             | 35,332,935       | G_Ch6B_35332935  | 2019  | 3.814     | 0.148                 |
|             |                  |                  | 2018  | 3.667     | 0.150                 |
|             | 35,332,964       | G_Ch6B_35332964  | 2019  | 3.814     | 0.148                 |
|             |                  |                  | 2018  | 3.667     | 0.150                 |
|             | 35,465,452       | G_Ch6B_35465452  | 2019  | 3.814     | 0.148                 |
|             |                  |                  | 2018  | 3.667     | 0.150                 |
|             | 35,612,523       | G_Ch6B_35612523  | 2019  | 3.607     | 0.138                 |
|             |                  |                  | 2018  | 3.497     | 0.142                 |
|             | 35,633,064       | G_Ch6B_35633064  | 2019  | 3.607     | 0.138                 |
|             |                  |                  | 2018  | 3.497     | 0.142                 |
|             | 35,633,083       | G_Ch6B_35633083  | 2019  | 3.814     | 0.148                 |
|             |                  |                  | 2018  | 3.667     | 0.150                 |
|             | 35,858,833       | G_Ch6B_35858833  | 2019  | 3.607     | 0.138                 |
|             |                  |                  | 2018  | 3.497     | 0.142                 |
|             | 35,859,846       | G_Ch6B_35859846  | 2019  | 3.814     | 0.148                 |
|             |                  |                  | 2018  | 3.667     | 0.150                 |
| 36,569,353  | G_Ch6B_36569353  | 2019             | 3.393 | 0.128     |                       |
|             |                  | 2016             | 3.058 | 0.112     |                       |
| 36,600,945  | G_Ch6B_36600945  | 2019             | 4.013 | 0.158     |                       |
|             |                  | 2017             | 3.402 | 0.129     |                       |
|             |                  | 2018             | 3.300 | 0.132     |                       |
|             |                  | 2016             | 3.227 | 0.119     |                       |
| 36,600,970  | G_Ch6B_36600970  | 2018             | 3.643 | 0.149     |                       |
|             |                  | 2016             | 3.270 | 0.121     |                       |
|             |                  | 2019             | 3.016 | 0.111     |                       |
| 130,680,696 | G_Ch6D_130680696 | 2017             | 3.909 | 0.153     |                       |
|             |                  | 2020             | 3.642 | 0.136     |                       |
|             |                  | 2019             | 3.386 | 0.128     |                       |
|             |                  | 2018             | 3.225 | 0.128     |                       |
| 6D          | 133,764,781      | R_Ch6D_133764781 | 2017  | 3.559     | 0.136                 |
|             |                  |                  | 2020  | 3.241     | 0.118                 |
|             |                  |                  | 2019  | 3.050     | 0.112                 |
|             |                  |                  | 2018  | 3.042     | 0.119                 |
| 300,930,272 | G_Ch6D_300930272 | 2017             | 3.464 | 0.132     |                       |
|             |                  | 2020             | 3.271 | 0.119     |                       |
|             |                  | 2019             | 3.255 | 0.122     |                       |

**Supplemental Table 7. Marker–trait associations (MTAs) detected over multiple years for the culm length (CL)**

| Chr.       | Position         | Marker           | Year  | log <sub>10</sub> (-p) | Marker R <sup>2</sup> |
|------------|------------------|------------------|-------|------------------------|-----------------------|
| 2D         | 22,056,470       | G_Chr2D_22056470 | 2020  | 3.775                  | 0.162                 |
|            |                  |                  | 2018  | 3.570                  | 0.151                 |
|            | 22,056,546       | G_Chr2D_22056546 | 2020  | 3.775                  | 0.162                 |
|            |                  |                  | 2018  | 3.570                  | 0.151                 |
|            | 22,106,696       | G_Chr2D_22106696 | 2020  | 3.775                  | 0.162                 |
|            |                  |                  | 2018  | 3.570                  | 0.151                 |
|            | 22,106,742       | G_Chr2D_22106742 | 2020  | 3.775                  | 0.162                 |
|            |                  |                  | 2018  | 3.570                  | 0.151                 |
|            | 23,050,974       | G_Chr2D_23050974 | 2020  | 3.775                  | 0.162                 |
|            |                  |                  | 2018  | 3.570                  | 0.151                 |
|            | 23,050,984       | G_Chr2D_23050984 | 2020  | 3.775                  | 0.162                 |
|            |                  |                  | 2018  | 3.570                  | 0.151                 |
|            | 23,051,001       | G_Chr2D_23051001 | 2020  | 3.775                  | 0.162                 |
|            |                  |                  | 2018  | 3.570                  | 0.151                 |
|            | 23,070,511       | G_Chr2D_23070511 | 2020  | 3.775                  | 0.162                 |
|            |                  |                  | 2018  | 3.570                  | 0.151                 |
|            | 23,071,570       | G_Chr2D_23071570 | 2020  | 3.775                  | 0.162                 |
|            |                  |                  | 2018  | 3.570                  | 0.151                 |
|            | 23,071,583       | G_Chr2D_23071583 | 2020  | 3.775                  | 0.162                 |
|            |                  |                  | 2018  | 3.570                  | 0.151                 |
|            | 23,071,624       | G_Chr2D_23071624 | 2020  | 3.775                  | 0.162                 |
|            |                  |                  | 2018  | 3.570                  | 0.151                 |
|            | 23,698,547       | G_Chr2D_23698547 | 2020  | 3.775                  | 0.162                 |
|            |                  |                  | 2018  | 3.570                  | 0.151                 |
|            | 23,849,102       | G_Chr2D_23849102 | 2020  | 3.650                  | 0.155                 |
|            |                  |                  | 2018  | 3.330                  | 0.138                 |
|            | 23,849,108       | G_Chr2D_23849108 | 2020  | 3.650                  | 0.155                 |
|            |                  |                  | 2018  | 3.330                  | 0.138                 |
|            | 23,849,120       | G_Chr2D_23849120 | 2020  | 3.650                  | 0.155                 |
|            |                  |                  | 2018  | 3.330                  | 0.138                 |
|            | 23,860,361       | G_Chr2D_23860361 | 2020  | 3.650                  | 0.155                 |
|            |                  |                  | 2018  | 3.330                  | 0.138                 |
| 23,860,412 | G_Chr2D_23860412 | 2020             | 3.650 | 0.155                  |                       |
|            |                  | 2018             | 3.330 | 0.138                  |                       |
| 23,860,424 | G_Chr2D_23860424 | 2020             | 3.650 | 0.155                  |                       |
|            |                  | 2018             | 3.330 | 0.138                  |                       |
| 23,860,716 | G_Chr2D_23860716 | 2020             | 3.650 | 0.155                  |                       |
|            |                  | 2018             | 3.330 | 0.138                  |                       |
| 23,860,723 | G_Chr2D_23860723 | 2020             | 3.650 | 0.155                  |                       |
|            |                  | 2018             | 3.330 | 0.138                  |                       |
| 23,860,740 | G_Chr2D_23860740 | 2020             | 3.650 | 0.155                  |                       |
|            |                  | 2018             | 3.330 | 0.138                  |                       |
| 23,935,165 | G_Chr2D_23935165 | 2020             | 3.650 | 0.155                  |                       |
|            |                  | 2018             | 3.330 | 0.138                  |                       |
| 23,963,647 | R_Chr2D_23963647 | 2020             | 3.650 | 0.155                  |                       |
|            |                  | 2018             | 3.330 | 0.138                  |                       |
| 24,024,355 | G_Chr2D_24024355 | 2020             | 3.650 | 0.155                  |                       |
|            |                  | 2018             | 3.330 | 0.138                  |                       |
| 24,029,297 | G_Chr2D_24029297 | 2020             | 3.650 | 0.155                  |                       |
|            |                  | 2018             | 3.330 | 0.138                  |                       |
| 24,046,218 | G_Chr2D_24046218 | 2020             | 3.650 | 0.155                  |                       |
|            |                  | 2018             | 3.330 | 0.138                  |                       |

|    |             |                   |      |       |       |
|----|-------------|-------------------|------|-------|-------|
|    | 73,102,274  | G_Chr2D_73102274  | 2019 | 3.423 | 0.142 |
|    |             |                   | 2018 | 3.173 | 0.130 |
|    | 73,105,801  | G_Chr2D_73105801  | 2019 | 3.423 | 0.142 |
|    |             |                   | 2018 | 3.173 | 0.130 |
|    | 73,815,962  | G_Chr2D_73815962  | 2019 | 3.423 | 0.142 |
|    |             |                   | 2018 | 3.173 | 0.130 |
|    | 73,815,974  | G_Chr2D_73815974  | 2019 | 3.423 | 0.142 |
|    |             |                   | 2018 | 3.173 | 0.130 |
|    |             |                   | 2019 | 3.575 | 0.150 |
|    | 7,337,076   | G_Chr5A_7337076   | 2016 | 3.325 | 0.135 |
|    |             |                   | 2020 | 3.289 | 0.136 |
|    |             |                   | 2018 | 3.132 | 0.128 |
|    |             |                   | 2018 | 4.857 | 0.222 |
|    | 9,857,051   | G_Chr5A_9857051   | 2019 | 4.187 | 0.183 |
|    |             |                   | 2020 | 4.117 | 0.180 |
|    |             |                   | 2016 | 3.227 | 0.130 |
|    | 11,895,571  | snp3197_1         | 2018 | 3.306 | 0.137 |
|    |             |                   | 2019 | 3.057 | 0.124 |
|    | 12,220,141  | R_Chr5A_12220141  | 2018 | 3.306 | 0.137 |
|    |             |                   | 2019 | 3.057 | 0.124 |
|    | 439,765,378 | R_Chr5A_439765378 | 2019 | 3.449 | 0.144 |
|    |             |                   | 2018 | 3.220 | 0.133 |
|    | 439,765,655 | R_Chr5A_439765655 | 2019 | 3.449 | 0.144 |
|    |             |                   | 2018 | 3.220 | 0.133 |
|    | 439,954,753 | G_Chr5A_439954753 | 2019 | 3.449 | 0.144 |
|    |             |                   | 2018 | 3.220 | 0.133 |
|    | 439,954,764 | G_Chr5A_439954764 | 2019 | 3.449 | 0.144 |
|    |             |                   | 2018 | 3.220 | 0.133 |
|    | 439,954,816 | G_Chr5A_439954816 | 2019 | 3.449 | 0.144 |
|    |             |                   | 2018 | 3.220 | 0.133 |
|    | 440,147,925 | R_Chr5A_440147925 | 2019 | 3.449 | 0.144 |
|    |             |                   | 2018 | 3.220 | 0.133 |
|    | 440,148,043 | R_Chr5A_440148043 | 2019 | 3.449 | 0.144 |
|    |             |                   | 2018 | 3.220 | 0.133 |
| 5A | 440,148,140 | R_Chr5A_440148140 | 2019 | 3.449 | 0.144 |
|    |             |                   | 2018 | 3.220 | 0.133 |
|    | 440,249,756 | R_Chr5A_440249756 | 2019 | 3.449 | 0.144 |
|    |             |                   | 2018 | 3.220 | 0.133 |
|    | 440,249,799 | R_Chr5A_440249799 | 2019 | 3.449 | 0.144 |
|    |             |                   | 2018 | 3.220 | 0.133 |
|    | 440,249,853 | R_Chr5A_440249853 | 2019 | 3.449 | 0.144 |
|    |             |                   | 2018 | 3.220 | 0.133 |
|    | 440,406,043 | G_Chr5A_440406043 | 2019 | 3.449 | 0.144 |
|    |             |                   | 2018 | 3.220 | 0.133 |
|    | 440,426,536 | G_Chr5A_440426536 | 2019 | 3.449 | 0.144 |
|    |             |                   | 2018 | 3.220 | 0.133 |
|    | 440,426,580 | G_Chr5A_440426580 | 2019 | 3.449 | 0.144 |
|    |             |                   | 2018 | 3.220 | 0.133 |
|    | 440,819,271 | G_Chr5A_440819271 | 2019 | 3.449 | 0.144 |
|    |             |                   | 2018 | 3.220 | 0.133 |
|    | 442,100,000 | R_Chr5A_442100000 | 2019 | 3.503 | 0.146 |
|    |             |                   | 2016 | 3.096 | 0.123 |
|    |             |                   | 2018 | 4.693 | 0.212 |
|    | 665,410,239 | G_Chr5A_665410239 | 2017 | 3.462 | 0.146 |
|    |             |                   | 2019 | 3.416 | 0.142 |
|    |             |                   | 2020 | 3.153 | 0.129 |

|       |             |                      |      |       |       |
|-------|-------------|----------------------|------|-------|-------|
|       |             |                      | 2018 | 4.693 | 0.212 |
|       | 666,602,459 | G_Ch5A_666602459     | 2017 | 3.462 | 0.146 |
|       |             |                      | 2019 | 3.416 | 0.142 |
|       |             |                      | 2020 | 3.153 | 0.129 |
|       | 708,796,936 | G_Ch5A_708796936     | 2020 | 3.427 | 0.143 |
|       |             |                      | 2018 | 3.416 | 0.143 |
|       | 420,419,443 | R_Ch5B_420419443     | 2017 | 3.075 | 0.126 |
|       |             |                      | 2018 | 3.029 | 0.123 |
| 5B    | 420,419,473 | R_Ch5B_420419473     | 2017 | 3.075 | 0.126 |
|       |             |                      | 2018 | 3.029 | 0.123 |
|       | 422,158,046 | R_Ch5B_422158046     | 2017 | 3.075 | 0.126 |
|       |             |                      | 2018 | 3.029 | 0.123 |
|       | 552,393,964 | G_Ch5D_552393964     | 2018 | 3.221 | 0.133 |
|       |             |                      | 2017 | 3.165 | 0.130 |
| 5D    |             |                      | 2019 | 3.143 | 0.128 |
|       |             |                      | 2018 | 3.221 | 0.133 |
|       | 552,849,649 | G_Ch5D_552849649     | 2017 | 3.165 | 0.130 |
|       |             |                      | 2019 | 3.143 | 0.128 |
|       | 128,687,482 | G_Ch6A_128687482     | 2018 | 4.194 | 0.185 |
|       |             |                      | 2017 | 3.461 | 0.146 |
|       |             |                      | 2019 | 3.371 | 0.140 |
|       | 138,855,000 | G_Ch6A_138855000     | 2018 | 4.194 | 0.185 |
|       |             |                      | 2017 | 3.461 | 0.146 |
|       |             |                      | 2019 | 3.371 | 0.140 |
| 6A    | 609,939,415 | G_Ch6A_609939415     | 2018 | 3.502 | 0.147 |
|       |             |                      | 2019 | 3.253 | 0.134 |
|       |             |                      | 2017 | 3.168 | 0.130 |
|       | 609,939,438 | G_Ch6A_609939438     | 2018 | 3.502 | 0.147 |
|       |             |                      | 2019 | 3.253 | 0.134 |
|       |             |                      | 2017 | 3.168 | 0.130 |
|       | 609,939,460 | G_Ch6A_609939460     | 2018 | 3.502 | 0.147 |
|       |             |                      | 2019 | 3.253 | 0.134 |
|       |             |                      | 2017 | 3.168 | 0.130 |
|       | 717,676,609 | G_Ch6B_717676609     | 2019 | 4.055 | 0.176 |
|       |             |                      | 2016 | 3.900 | 0.164 |
|       |             |                      | 2018 | 3.745 | 0.160 |
|       |             |                      | 2020 | 3.431 | 0.143 |
|       | 717,788,119 | G_Ch6B_717788119     | 2019 | 4.680 | 0.210 |
|       |             |                      | 2018 | 4.660 | 0.211 |
| 6B    |             |                      | 2020 | 4.351 | 0.193 |
|       |             |                      | 2016 | 3.836 | 0.161 |
|       |             |                      | 2017 | 3.246 | 0.134 |
|       | 718,083,564 | G_Ch6B_718083564     | 2019 | 3.333 | 0.138 |
|       |             |                      | 2016 | 3.145 | 0.126 |
|       | 718,666,921 | G_Ch6B_718666921     | 2019 | 3.480 | 0.145 |
|       |             |                      | 2018 | 3.235 | 0.134 |
|       | 718,985,803 | R_Ch6B_718985803     | 2019 | 3.480 | 0.145 |
|       |             |                      | 2018 | 3.235 | 0.134 |
|       | 719,479,762 | G_Ch6B_719479762     | 2019 | 3.480 | 0.145 |
|       |             |                      | 2018 | 3.235 | 0.134 |
| 7D    | 114,214,642 | G_Ch7D_114214642     | 2019 | 3.243 | 0.133 |
|       |             |                      | 2018 | 3.180 | 0.131 |
| chrUn | 18,482,772  | G_ChUnknown_18482772 | 2020 | 3.775 | 0.162 |
|       |             |                      | 2018 | 3.570 | 0.151 |
|       | 18,482,783  | G_ChUnknown_18482783 | 2020 | 3.775 | 0.162 |
|       |             |                      | 2018 | 3.570 | 0.151 |

**Supplemental Table 8. Marker–trait associations (MTAs) detected over multiple years for the spike length (SL)**

| Chr.       | Position        | Marker           | Year  | log10(-p) | Marker R <sup>2</sup> |
|------------|-----------------|------------------|-------|-----------|-----------------------|
| 2A         | 594,606,956     | R_Ch2A_594606956 | 2018  | 3.516     | 0.149                 |
|            |                 |                  | 2020  | 3.061     | 0.126                 |
|            | 596,914,455     | R_Ch2A_596914455 | 2018  | 3.516     | 0.149                 |
|            |                 |                  | 2020  | 3.061     | 0.126                 |
|            | 604,204,391     | R_Ch2A_604204391 | 2018  | 3.516     | 0.149                 |
|            |                 |                  | 2020  | 3.061     | 0.126                 |
| 2B         | 803,096,394     | G_Ch2B_803096394 | 2020  | 3.407     | 0.144                 |
|            |                 |                  | 2018  | 3.071     | 0.126                 |
|            | 19,667,354      | R_Ch2D_19667354  | 2020  | 3.726     | 0.161                 |
|            |                 |                  | 2018  | 3.462     | 0.146                 |
|            |                 |                  | 2019  | 3.298     | 0.138                 |
|            |                 |                  | 2017  | 3.089     | 0.127                 |
|            |                 |                  | 2020  | 3.726     | 0.161                 |
|            |                 |                  | 2018  | 3.462     | 0.146                 |
|            | 19,667,575      | R_Ch2D_19667575  | 2019  | 3.298     | 0.138                 |
|            |                 |                  | 2017  | 3.089     | 0.127                 |
|            |                 |                  | 2020  | 3.726     | 0.161                 |
|            | 19,670,544      | G_Ch2D_19670544  | 2018  | 3.462     | 0.146                 |
|            |                 |                  | 2019  | 3.298     | 0.138                 |
|            |                 |                  | 2017  | 3.089     | 0.127                 |
| 19,868,310 | G_Ch2D_19868310 | 2020             | 3.726 | 0.161     |                       |
|            |                 | 2018             | 3.462 | 0.146     |                       |
|            |                 | 2019             | 3.298 | 0.138     |                       |
| 19,868,322 | G_Ch2D_19868322 | 2017             | 3.089 | 0.127     |                       |
|            |                 | 2020             | 3.726 | 0.161     |                       |
|            |                 | 2018             | 3.462 | 0.146     |                       |
| 19,868,386 | G_Ch2D_19868386 | 2019             | 3.298 | 0.138     |                       |
|            |                 | 2017             | 3.089 | 0.127     |                       |
|            |                 | 2020             | 3.726 | 0.161     |                       |
| 20,446,572 | G_Ch2D_20446572 | 2018             | 5.242 | 0.246     |                       |
|            |                 | 2020             | 4.762 | 0.218     |                       |
|            |                 | 2017             | 3.271 | 0.137     |                       |
| 21,120,861 | G_Ch2D_21120861 | 2018             | 5.242 | 0.246     |                       |
|            |                 | 2020             | 4.762 | 0.218     |                       |
|            |                 | 2017             | 3.271 | 0.137     |                       |
| 21,128,584 | G_Ch2D_21128584 | 2018             | 5.242 | 0.246     |                       |
|            |                 | 2020             | 4.762 | 0.218     |                       |
|            |                 | 2017             | 3.271 | 0.137     |                       |
| 21,128,621 | G_Ch2D_21128621 | 2018             | 5.242 | 0.246     |                       |
|            |                 | 2020             | 4.762 | 0.218     |                       |
|            |                 | 2017             | 3.271 | 0.137     |                       |
| 21,260,160 | G_Ch2D_21260160 | 2018             | 5.242 | 0.246     |                       |
|            |                 | 2020             | 4.762 | 0.218     |                       |
|            |                 | 2017             | 3.271 | 0.137     |                       |
| 21,268,060 | G_Ch2D_21268060 | 2018             | 5.242 | 0.246     |                       |
|            |                 | 2020             | 4.762 | 0.218     |                       |
|            |                 | 2017             | 3.271 | 0.137     |                       |

|    |            |                 |      |       |       |
|----|------------|-----------------|------|-------|-------|
|    |            |                 | 2018 | 5.242 | 0.246 |
|    | 21,279,081 | G_Ch2D_21279081 | 2020 | 4.762 | 0.218 |
|    |            |                 | 2017 | 3.271 | 0.137 |
|    |            |                 | 2018 | 5.242 | 0.246 |
|    | 21,279,086 | G_Ch2D_21279086 | 2020 | 4.762 | 0.218 |
|    |            |                 | 2017 | 3.271 | 0.137 |
|    |            |                 | 2018 | 5.242 | 0.246 |
|    | 21,279,100 | G_Ch2D_21279100 | 2020 | 4.762 | 0.218 |
|    |            |                 | 2017 | 3.271 | 0.137 |
|    |            |                 | 2018 | 5.242 | 0.246 |
|    | 21,295,292 | G_Ch2D_21295292 | 2020 | 4.762 | 0.218 |
|    |            |                 | 2017 | 3.271 | 0.137 |
|    |            |                 | 2018 | 5.242 | 0.246 |
|    | 21,319,179 | G_Ch2D_21319179 | 2020 | 4.762 | 0.218 |
|    |            |                 | 2017 | 3.271 | 0.137 |
|    |            |                 | 2018 | 5.094 | 0.237 |
|    | 22,056,470 | G_Ch2D_22056470 | 2020 | 4.851 | 0.223 |
|    |            |                 | 2019 | 3.719 | 0.160 |
|    |            |                 | 2017 | 3.073 | 0.127 |
|    |            |                 | 2018 | 5.094 | 0.237 |
|    | 22,056,546 | G_Ch2D_22056546 | 2020 | 4.851 | 0.223 |
|    |            |                 | 2019 | 3.719 | 0.160 |
|    |            |                 | 2017 | 3.073 | 0.127 |
|    |            |                 | 2018 | 5.094 | 0.237 |
|    | 22,106,696 | G_Ch2D_22106696 | 2020 | 4.851 | 0.223 |
|    |            |                 | 2019 | 3.719 | 0.160 |
|    |            |                 | 2017 | 3.073 | 0.127 |
|    |            |                 | 2018 | 5.094 | 0.237 |
|    | 22,106,742 | G_Ch2D_22106742 | 2020 | 4.851 | 0.223 |
|    |            |                 | 2019 | 3.719 | 0.160 |
|    |            |                 | 2017 | 3.073 | 0.127 |
|    |            |                 | 2018 | 5.094 | 0.237 |
|    | 23,050,974 | G_Ch2D_23050974 | 2020 | 4.851 | 0.223 |
|    |            |                 | 2019 | 3.719 | 0.160 |
|    |            |                 | 2017 | 3.073 | 0.127 |
| 2D |            |                 | 2018 | 5.094 | 0.237 |
|    | 23,050,984 | G_Ch2D_23050984 | 2020 | 4.851 | 0.223 |
|    |            |                 | 2019 | 3.719 | 0.160 |
|    |            |                 | 2017 | 3.073 | 0.127 |
|    |            |                 | 2018 | 5.094 | 0.237 |
|    | 23,051,001 | G_Ch2D_23051001 | 2020 | 4.851 | 0.223 |
|    |            |                 | 2019 | 3.719 | 0.160 |
|    |            |                 | 2017 | 3.073 | 0.127 |
|    |            |                 | 2018 | 5.094 | 0.237 |
|    | 23,070,511 | G_Ch2D_23070511 | 2020 | 4.851 | 0.223 |
|    |            |                 | 2019 | 3.719 | 0.160 |
|    |            |                 | 2017 | 3.073 | 0.127 |
|    |            |                 | 2018 | 5.094 | 0.237 |
|    | 23,071,570 | G_Ch2D_23071570 | 2020 | 4.851 | 0.223 |
|    |            |                 | 2019 | 3.719 | 0.160 |
|    |            |                 | 2017 | 3.073 | 0.127 |
|    |            |                 | 2018 | 5.094 | 0.237 |
|    | 23,071,583 | G_Ch2D_23071583 | 2020 | 4.851 | 0.223 |
|    |            |                 | 2019 | 3.719 | 0.160 |

|            |                  |      |       |       |
|------------|------------------|------|-------|-------|
|            |                  | 2017 | 3.073 | 0.127 |
|            |                  | 2018 | 5.094 | 0.237 |
| 23,071,624 | G_Chr2D_23071624 | 2020 | 4.851 | 0.223 |
|            |                  | 2019 | 3.719 | 0.160 |
|            |                  | 2017 | 3.073 | 0.127 |
|            |                  | 2018 | 5.094 | 0.237 |
| 23,698,547 | G_Chr2D_23698547 | 2020 | 4.851 | 0.223 |
|            |                  | 2019 | 3.719 | 0.160 |
|            |                  | 2017 | 3.073 | 0.127 |
|            |                  | 2020 | 3.996 | 0.175 |
| 23,758,078 | G_Chr2D_23758078 | 2019 | 3.479 | 0.147 |
|            |                  | 2018 | 3.068 | 0.126 |
|            |                  | 2020 | 3.996 | 0.175 |
| 23,758,087 | G_Chr2D_23758087 | 2019 | 3.479 | 0.147 |
|            |                  | 2018 | 3.068 | 0.126 |
|            |                  | 2018 | 4.873 | 0.224 |
| 23,849,102 | G_Chr2D_23849102 | 2020 | 4.367 | 0.196 |
|            |                  | 2019 | 3.039 | 0.124 |
|            |                  | 2018 | 4.873 | 0.224 |
| 23,849,108 | G_Chr2D_23849108 | 2020 | 4.367 | 0.196 |
|            |                  | 2019 | 3.039 | 0.124 |
|            |                  | 2018 | 4.873 | 0.224 |
| 23,849,120 | G_Chr2D_23849120 | 2020 | 4.367 | 0.196 |
|            |                  | 2019 | 3.039 | 0.124 |
|            |                  | 2018 | 4.873 | 0.224 |
| 23,860,361 | G_Chr2D_23860361 | 2020 | 4.367 | 0.196 |
|            |                  | 2019 | 3.039 | 0.124 |
|            |                  | 2018 | 4.873 | 0.224 |
| 23,860,412 | G_Chr2D_23860412 | 2020 | 4.367 | 0.196 |
|            |                  | 2019 | 3.039 | 0.124 |
|            |                  | 2018 | 4.873 | 0.224 |
| 23,860,424 | G_Chr2D_23860424 | 2020 | 4.367 | 0.196 |
|            |                  | 2019 | 3.039 | 0.124 |
|            |                  | 2018 | 4.873 | 0.224 |
| 23,860,716 | G_Chr2D_23860716 | 2020 | 4.367 | 0.196 |
|            |                  | 2019 | 3.039 | 0.124 |
|            |                  | 2018 | 4.873 | 0.224 |
| 23,860,723 | G_Chr2D_23860723 | 2020 | 4.367 | 0.196 |
|            |                  | 2019 | 3.039 | 0.124 |
|            |                  | 2018 | 4.873 | 0.224 |
| 23,860,740 | G_Chr2D_23860740 | 2020 | 4.367 | 0.196 |
|            |                  | 2019 | 3.039 | 0.124 |
|            |                  | 2018 | 4.873 | 0.224 |
| 23,935,165 | G_Chr2D_23935165 | 2020 | 4.367 | 0.196 |
|            |                  | 2019 | 3.039 | 0.124 |
|            |                  | 2018 | 4.873 | 0.224 |
| 23,963,647 | R_Chr2D_23963647 | 2020 | 4.367 | 0.196 |
|            |                  | 2019 | 3.039 | 0.124 |
|            |                  | 2018 | 4.873 | 0.224 |
| 24,024,355 | G_Chr2D_24024355 | 2020 | 4.367 | 0.196 |
|            |                  | 2019 | 3.039 | 0.124 |
|            |                  | 2018 | 4.873 | 0.224 |
| 24,029,297 | G_Chr2D_24029297 | 2020 | 4.367 | 0.196 |
|            |                  | 2019 | 3.039 | 0.124 |

|       |             |                        |      |       |       |
|-------|-------------|------------------------|------|-------|-------|
|       |             |                        | 2018 | 4.873 | 0.224 |
|       | 24,046,218  | G_Chrc2D_24046218      | 2020 | 4.367 | 0.196 |
|       |             |                        | 2019 | 3.039 | 0.124 |
|       |             |                        | 2018 | 5.627 | 0.268 |
|       | 24,726,982  | tarc1446               | 2020 | 4.863 | 0.224 |
|       |             |                        | 2017 | 4.153 | 0.184 |
|       |             |                        | 2019 | 4.000 | 0.175 |
|       |             |                        | 2016 | 3.567 | 0.151 |
|       | 60,189,000  | tarc0517               | 2018 | 3.827 | 0.166 |
|       |             |                        | 2020 | 3.376 | 0.142 |
| 3A    |             |                        | 2018 | 3.278 | 0.137 |
|       | 716,812,904 | G_Chrc3A_716812904     | 2016 | 3.177 | 0.130 |
|       |             |                        | 2019 | 3.106 | 0.128 |
|       |             |                        | 2018 | 4.917 | 0.227 |
|       |             |                        | 2020 | 4.564 | 0.207 |
| 3D    | 576,645,901 | G_Chrc3D_576645901     | 2017 | 4.321 | 0.194 |
|       |             |                        | 2016 | 3.271 | 0.135 |
|       |             |                        | 2019 | 3.035 | 0.124 |
|       | 107,925,196 | G_Chrc4A_107925196     | 2018 | 3.312 | 0.138 |
|       |             |                        | 2020 | 3.281 | 0.137 |
| 4A    |             |                        | 2018 | 3.312 | 0.138 |
|       | 145,251,348 | G_Chrc4A_145251348     | 2020 | 3.281 | 0.137 |
|       |             |                        | 2018 | 3.593 | 0.153 |
|       | 385,614,577 | R_Chrc5B_385614577     | 2020 | 3.386 | 0.142 |
|       |             |                        | 2017 | 3.094 | 0.128 |
| 5B    |             |                        | 2018 | 3.593 | 0.153 |
|       | 385,636,679 | G_Chrc5B_385636679     | 2020 | 3.386 | 0.142 |
|       |             |                        | 2017 | 3.094 | 0.128 |
|       | 99,226,546  | G_Chrc7B_99226546      | 2016 | 3.131 | 0.128 |
|       |             |                        | 2017 | 3.018 | 0.124 |
|       | 100,132,247 | G_Chrc7B_100132247     | 2016 | 3.131 | 0.128 |
|       |             |                        | 2017 | 3.018 | 0.124 |
|       | 100,579,102 | R_Chrc7B_100579102     | 2016 | 3.131 | 0.128 |
|       |             |                        | 2017 | 3.018 | 0.124 |
|       | 100,579,115 | R_Chrc7B_100579115     | 2016 | 3.131 | 0.128 |
|       |             |                        | 2017 | 3.018 | 0.124 |
| 7B    |             |                        | 2016 | 3.131 | 0.128 |
|       | 100,579,166 | R_Chrc7B_100579166     | 2017 | 3.018 | 0.124 |
|       |             |                        | 2016 | 3.131 | 0.128 |
|       | 100,579,194 | R_Chrc7B_100579194     | 2017 | 3.018 | 0.124 |
|       |             |                        | 2018 | 3.397 | 0.143 |
|       | 203,239,104 | G_Chrc7B_203239104     | 2017 | 3.180 | 0.132 |
|       |             |                        | 2020 | 3.177 | 0.132 |
|       | 712,264,197 | G_Chrc7B_712264197     | 2020 | 4.208 | 0.187 |
|       |             |                        | 2018 | 3.551 | 0.151 |
|       |             |                        | 2018 | 5.094 | 0.237 |
|       | 18,482,772  | G_ChrcUnknown_18482772 | 2020 | 4.851 | 0.223 |
|       |             |                        | 2019 | 3.719 | 0.160 |
|       |             |                        | 2017 | 3.073 | 0.127 |
| chrUn |             |                        | 2018 | 5.094 | 0.237 |
|       | 18,482,783  | G_ChrcUnknown_18482783 | 2020 | 4.851 | 0.223 |
|       |             |                        | 2019 | 3.719 | 0.160 |
|       |             |                        | 2017 | 3.073 | 0.127 |

**Supplemental Table 9. Marker–trait associations (MTAs) detected over multiple years for the spike density (SD)**

| Chr.       | Position         | Marker           | Year  | log10(-p) | Marker R <sup>2</sup> |
|------------|------------------|------------------|-------|-----------|-----------------------|
| 2D         | 15,341,074       | G_Chr2D_15341074 | 2019  | 3.318     | 0.139                 |
|            |                  |                  | 2017  | 3.133     | 0.128                 |
|            | 15,341,132       | G_Chr2D_15341132 | 2019  | 3.318     | 0.139                 |
|            |                  |                  | 2017  | 3.133     | 0.128                 |
|            | 19,667,354       | R_Chr2D_19667354 | 2018  | 3.182     | 0.132                 |
|            |                  |                  | 2019  | 3.144     | 0.130                 |
|            |                  |                  | 2020  | 3.048     | 0.122                 |
|            | 19,667,575       | R_Chr2D_19667575 | 2018  | 3.182     | 0.132                 |
|            |                  |                  | 2019  | 3.144     | 0.130                 |
|            |                  |                  | 2020  | 3.048     | 0.122                 |
|            | 19,670,544       | G_Chr2D_19670544 | 2018  | 3.182     | 0.132                 |
|            |                  |                  | 2019  | 3.144     | 0.130                 |
|            |                  |                  | 2020  | 3.048     | 0.122                 |
|            | 19,868,310       | G_Chr2D_19868310 | 2018  | 3.182     | 0.132                 |
|            |                  |                  | 2019  | 3.144     | 0.130                 |
|            |                  |                  | 2020  | 3.048     | 0.122                 |
|            | 19,868,322       | G_Chr2D_19868322 | 2018  | 3.182     | 0.132                 |
|            |                  |                  | 2019  | 3.144     | 0.130                 |
|            |                  |                  | 2020  | 3.048     | 0.122                 |
|            | 19,868,386       | G_Chr2D_19868386 | 2018  | 3.182     | 0.132                 |
|            |                  |                  | 2019  | 3.144     | 0.130                 |
|            |                  |                  | 2020  | 3.048     | 0.122                 |
|            | 20,446,572       | G_Chr2D_20446572 | 2020  | 3.863     | 0.165                 |
|            |                  |                  | 2018  | 3.804     | 0.165                 |
| 2017       |                  |                  | 3.283 | 0.136     |                       |
| 2019       |                  |                  | 3.228 | 0.134     |                       |
| 21,120,861 | G_Chr2D_21120861 | 2020             | 3.863 | 0.165     |                       |
|            |                  | 2018             | 3.804 | 0.165     |                       |
|            |                  | 2017             | 3.283 | 0.136     |                       |
|            |                  | 2019             | 3.228 | 0.134     |                       |
| 21,128,584 | G_Chr2D_21128584 | 2020             | 3.863 | 0.165     |                       |
|            |                  | 2018             | 3.804 | 0.165     |                       |
|            |                  | 2017             | 3.283 | 0.136     |                       |
|            |                  | 2019             | 3.228 | 0.134     |                       |
| 21,128,621 | G_Chr2D_21128621 | 2020             | 3.863 | 0.165     |                       |
|            |                  | 2018             | 3.804 | 0.165     |                       |
|            |                  | 2017             | 3.283 | 0.136     |                       |
|            |                  | 2019             | 3.228 | 0.134     |                       |
|            |                  |                  | 2020  | 3.863     | 0.165                 |

|    |             |                   |      |       |       |
|----|-------------|-------------------|------|-------|-------|
|    | 21,260,160  | G_Chr2D_21260160  | 2018 | 3.804 | 0.165 |
|    |             |                   | 2017 | 3.283 | 0.136 |
|    |             |                   | 2019 | 3.228 | 0.134 |
|    |             |                   | 2020 | 3.863 | 0.165 |
|    | 21,268,060  | G_Chr2D_21268060  | 2018 | 3.804 | 0.165 |
|    |             |                   | 2017 | 3.283 | 0.136 |
|    |             |                   | 2019 | 3.228 | 0.134 |
|    |             |                   | 2020 | 3.863 | 0.165 |
|    | 21,279,081  | G_Chr2D_21279081  | 2018 | 3.804 | 0.165 |
|    |             |                   | 2017 | 3.283 | 0.136 |
|    |             |                   | 2019 | 3.228 | 0.134 |
|    |             |                   | 2020 | 3.863 | 0.165 |
|    | 21,279,086  | G_Chr2D_21279086  | 2018 | 3.804 | 0.165 |
|    |             |                   | 2017 | 3.283 | 0.136 |
|    |             |                   | 2019 | 3.228 | 0.134 |
|    |             |                   | 2020 | 3.863 | 0.165 |
|    | 21,279,100  | G_Chr2D_21279100  | 2018 | 3.804 | 0.165 |
|    |             |                   | 2017 | 3.283 | 0.136 |
|    |             |                   | 2019 | 3.228 | 0.134 |
|    |             |                   | 2020 | 3.863 | 0.165 |
|    | 21,295,292  | G_Chr2D_21295292  | 2018 | 3.804 | 0.165 |
|    |             |                   | 2017 | 3.283 | 0.136 |
|    |             |                   | 2019 | 3.228 | 0.134 |
|    |             |                   | 2020 | 3.863 | 0.165 |
|    | 21,319,179  | G_Chr2D_21319179  | 2018 | 3.804 | 0.165 |
|    |             |                   | 2017 | 3.283 | 0.136 |
|    |             |                   | 2019 | 3.228 | 0.134 |
|    |             |                   | 2020 | 3.863 | 0.165 |
|    | 24,726,982  | tarc1446          | 2018 | 3.799 | 0.165 |
|    |             |                   | 2016 | 3.785 | 0.162 |
|    |             |                   | 2020 | 3.504 | 0.146 |
|    |             |                   | 2019 | 3.380 | 0.142 |
|    |             |                   | 2017 | 3.059 | 0.124 |
|    |             |                   | 2020 | 3.690 | 0.155 |
| 3D | 576,645,901 | G_Chr3D_576645901 | 2016 | 3.674 | 0.156 |
|    |             |                   | 2017 | 3.622 | 0.153 |
|    |             |                   | 2019 | 3.483 | 0.148 |
|    |             |                   | 2020 | 3.690 | 0.155 |
| 4D | 35,728,462  | G_Chr4D_35728462  | 2020 | 4.054 | 0.175 |
|    |             |                   | 2019 | 3.281 | 0.137 |
|    | 541,072,981 | G_Chr5B_541072981 | 2019 | 3.975 | 0.174 |
|    |             |                   | 2020 | 3.132 | 0.127 |
|    |             |                   | 2019 | 4.166 | 0.185 |
| 5B | 544,302,059 | G_Chr5B_544302059 | 2020 | 3.910 | 0.167 |
|    |             |                   | 2016 | 3.886 | 0.167 |

|    |             |                  |      |       |       |
|----|-------------|------------------|------|-------|-------|
|    |             |                  | 2017 | 3.111 | 0.127 |
|    |             |                  | 2019 | 4.166 | 0.185 |
|    | 544,733,353 | G_Ch5B_544733353 | 2020 | 3.910 | 0.167 |
|    |             |                  | 2016 | 3.886 | 0.167 |
|    |             |                  | 2017 | 3.111 | 0.127 |
|    | 174,924,572 | R_Ch6A_174924572 | 2016 | 3.211 | 0.132 |
|    |             |                  | 2019 | 3.024 | 0.124 |
| 6A | 190,309,836 | R_Ch6A_190309836 | 2018 | 3.423 | 0.145 |
|    |             |                  | 2016 | 3.091 | 0.126 |
|    |             |                  | 2019 | 3.023 | 0.124 |
|    | 192,673,544 | R_Ch6A_192673544 | 2018 | 3.217 | 0.134 |
|    |             |                  | 2016 | 3.080 | 0.125 |
|    | 3,469,660   | G_Ch7B_3469660   | 2016 | 3.810 | 0.163 |
|    |             |                  | 2018 | 3.080 | 0.127 |
|    | 99,226,546  | G_Ch7B_99226546  | 2019 | 3.257 | 0.136 |
|    |             |                  | 2017 | 3.152 | 0.129 |
|    | 100,132,247 | G_Ch7B_100132247 | 2019 | 3.257 | 0.136 |
|    |             |                  | 2017 | 3.152 | 0.129 |
| 7B | 100,579,102 | R_Ch7B_100579102 | 2019 | 3.257 | 0.136 |
|    |             |                  | 2017 | 3.152 | 0.129 |
|    | 100,579,115 | R_Ch7B_100579115 | 2019 | 3.257 | 0.136 |
|    |             |                  | 2017 | 3.152 | 0.129 |
|    | 100,579,166 | R_Ch7B_100579166 | 2019 | 3.257 | 0.136 |
|    |             |                  | 2017 | 3.152 | 0.129 |
|    | 100,579,194 | R_Ch7B_100579194 | 2019 | 3.257 | 0.136 |
|    |             |                  | 2017 | 3.152 | 0.129 |
|    |             |                  | 2020 | 3.197 | 0.130 |
| 7D | 31,636,771  | G_Ch7D_31636771  | 2019 | 3.084 | 0.127 |
|    |             |                  | 2016 | 3.005 | 0.122 |

**Supplemental Table 10. Marker–trait associations (MTAs) detected over multiple years for the grain numbers per spike (GNS)**

| Chr. | Position  | Marker           | Year | log10(-p) | Marker R <sup>2</sup> |
|------|-----------|------------------|------|-----------|-----------------------|
| 2B   | 29505126  | G_Ch2B_29505126  | 2016 | 3.721     | 0.160                 |
|      |           |                  | 2017 | 3.467     | 0.146                 |
|      |           |                  | 2019 | 3.445     | 0.141                 |
|      |           |                  | 2020 | 3.035     | 0.123                 |
|      | 728671668 | G_Ch2B_728671668 | 2017 | 4.609     | 0.208                 |
|      |           |                  | 2018 | 3.775     | 0.163                 |
|      |           |                  | 2020 | 3.467     | 0.145                 |
|      |           |                  |      | 3.117     | 0.127                 |
| 3A   | 668364722 | G_Ch3A_668364722 | 2017 | 3.100     | 0.127                 |
|      |           |                  | 2020 | 3.117     | 0.127                 |
|      | 668364729 | G_Ch3A_668364729 | 2017 | 3.100     | 0.127                 |
|      |           |                  | 2020 | 3.886     | 0.167                 |
| 6B   | 728450934 | G_Ch6B_728450934 | 2016 | 3.381     | 0.142                 |
|      |           |                  | 2019 | 3.201     | 0.129                 |
|      |           |                  | 2020 | 3.939     | 0.170                 |
|      | 730329182 | G_Ch6B_730329182 | 2019 | 3.932     | 0.166                 |
|      |           |                  | 2016 | 3.046     | 0.124                 |
|      |           |                  |      |           |                       |

**Supplemental Table 11. Marker–trait associations (MTAs) detected over multiple years for the grain numbers per spikelet(GNSL)**

| Chr. | Position    | Marker            | Year | log10(-p) | Marker R <sup>2</sup> |
|------|-------------|-------------------|------|-----------|-----------------------|
|      |             |                   | 2020 | 3.590     | 0.150                 |
| 2B   | 728,671,668 | G_Chr2B_728671668 | 2018 | 3.125     | 0.127                 |
|      |             |                   | 2017 | 3.086     | 0.114                 |
| 7B   | 711,853,721 | G_Chr7B_711853721 | 2019 | 3.223     | 0.130                 |
|      |             |                   | 2017 | 3.076     | 0.113                 |

**Supplemental Table 12. Marker–trait associations (MTAs) detected over multiple years for the thousand-kernel weight (TKW)**

| Chr.        | Position          | Marker            | Year  | log10(-p) | Marker R <sup>2</sup> |
|-------------|-------------------|-------------------|-------|-----------|-----------------------|
| 3A          | 533,585,802       | G_Chr3A_533585802 | 2018  | 3.284     | 0.137                 |
|             |                   |                   | 2017  | 3.032     | 0.121                 |
|             | 535,032,606       | R_Chr3A_535032606 | 2018  | 3.284     | 0.137                 |
|             |                   |                   | 2017  | 3.032     | 0.121                 |
|             | 535,032,633       | R_Chr3A_535032633 | 2018  | 3.284     | 0.137                 |
|             |                   |                   | 2017  | 3.032     | 0.121                 |
|             | 536,261,781       | R_Chr3A_536261781 | 2018  | 3.284     | 0.137                 |
|             |                   |                   | 2017  | 3.032     | 0.121                 |
|             | 536,295,152       | G_Chr3A_536295152 | 2018  | 3.284     | 0.137                 |
|             |                   |                   | 2017  | 3.032     | 0.121                 |
|             | 536,666,153       | G_Chr3A_536666153 | 2018  | 3.284     | 0.137                 |
|             |                   |                   | 2017  | 3.032     | 0.121                 |
| 6A          | 523,909,250       | G_Chr6A_523909250 | 2019  | 3.331     | 0.138                 |
|             |                   |                   | 2017  | 3.127     | 0.126                 |
|             | 524,053,443       | R_Chr6A_524053443 | 2019  | 3.331     | 0.138                 |
|             |                   |                   | 2017  | 3.127     | 0.126                 |
|             | 524,203,903       | R_Chr6A_524203903 | 2019  | 3.331     | 0.138                 |
|             |                   |                   | 2017  | 3.127     | 0.126                 |
|             | 524,683,741       | R_Chr6A_524683741 | 2019  | 3.331     | 0.138                 |
|             |                   |                   | 2017  | 3.127     | 0.126                 |
|             | 524,789,877       | G_Chr6A_524789877 | 2019  | 3.331     | 0.138                 |
|             |                   |                   | 2017  | 3.127     | 0.126                 |
|             | 525,558,660       | G_Chr6A_525558660 | 2019  | 3.331     | 0.138                 |
|             |                   |                   | 2017  | 3.127     | 0.126                 |
|             | 525,718,380       | R_Chr6A_525718380 | 2019  | 3.331     | 0.138                 |
|             |                   |                   | 2017  | 3.127     | 0.126                 |
|             | 525,725,661       | R_Chr6A_525725661 | 2019  | 3.331     | 0.138                 |
|             |                   |                   | 2017  | 3.127     | 0.126                 |
|             | 525,725,681       | R_Chr6A_525725681 | 2019  | 3.331     | 0.138                 |
|             |                   |                   | 2017  | 3.127     | 0.126                 |
|             | 525,809,715       | R_Chr6A_525809715 | 2019  | 3.331     | 0.138                 |
|             |                   |                   | 2017  | 3.127     | 0.126                 |
| 525,809,725 | R_Chr6A_525809725 | 2019              | 3.331 | 0.138     |                       |
|             |                   | 2017              | 3.127 | 0.126     |                       |
| 525,809,776 | R_Chr6A_525809776 | 2019              | 3.331 | 0.138     |                       |
|             |                   | 2017              | 3.127 | 0.126     |                       |
| 526,638,684 | G_Chr6A_526638684 | 2019              | 3.331 | 0.138     |                       |
|             |                   | 2017              | 3.127 | 0.126     |                       |
| 535,968,276 | G_Chr6A_535968276 | 2019              | 3.710 | 0.158     |                       |
|             |                   | 2016              | 3.455 | 0.144     |                       |
| 537,981,999 | R_Chr6A_537981999 | 2019              | 3.710 | 0.158     |                       |
|             |                   | 2016              | 3.455 | 0.144     |                       |
| 6D          | 485,252,487       | G_Chr6D_485252487 | 2016  | 3.375     | 0.140                 |
|             |                   |                   | 2019  | 3.095     | 0.126                 |
